# Supplementary material for: Efficient Charge Separation and Transport in Fullerene-CuPcOC8 Donor–Acceptor Nanorod Enhancing Photocatalytic Hydrogen Generation
Source: MDPI journal article supplement (doi:10.3390/nano14030256), 2024-01-24
Supplement: s1 [file s1]

# Supporting Information

## Efficient Charge Separation and Transport in Fullerene-CuPcOC<sub>8</sub> Donor-Acceptor Nanorod Enhancing Photocatalytic Hydrogen Generation

Zihui Hua<sup>1,2</sup>, Bo Wu<sup>1,2\*</sup>, Yuhe Zhang<sup>1</sup>, Chong Wang<sup>1,2</sup>, Tianyang Dong<sup>1</sup>, Yupeng Song<sup>2,3</sup>, Ying Jiang<sup>1,2</sup> and Chunru Wang<sup>1,2\*</sup>

*Dedicated to Professor Chunli Bai on the occasion of his 70th birthday*

<sup>1</sup> Beijing National Laboratory for Molecular Sciences, Key Laboratory of Molecular Nanostructure and Nanotechnology, Institute of Chemistry, Chinese Academy of Sciences, Beijing 100190, China; zhhuaa@iccas.ac.cn

<sup>2</sup> University of Chinese Academy of Sciences, Beijing 100049, China

<sup>3</sup> Key Laboratory of Photochemical Conversion and Optoelectronic Materials and CityU-CAS Joint Laboratory of Functional Materials and Devices, Technical Institute of Physics and Chemistry, Chinese Academy of Sciences, Beijing, 100190 China

\* Correspondence: zkywubo@iccas.ac.cn (B.W.); crwang@iccas.ac.cn (C.W.)

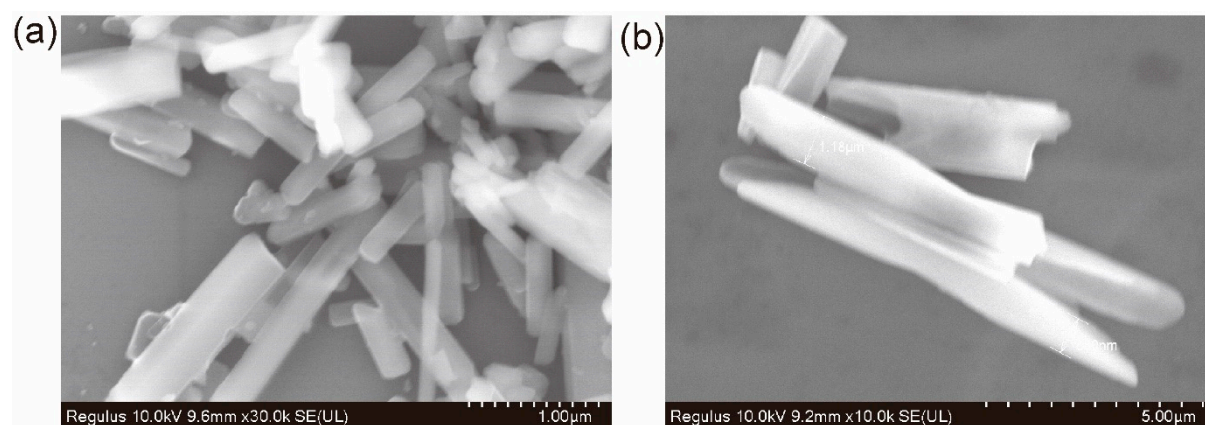

Figure S1. SEM for (a) C<sub>60</sub> and (b) CuPcOC<sub>8</sub>.

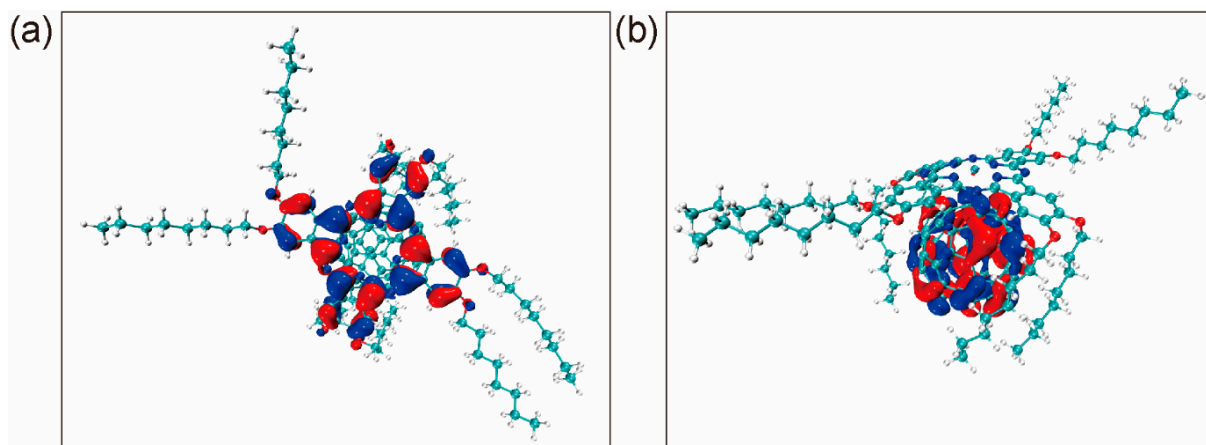

Figure S2. (a) LUMO and (b) HOMO of  $C_{60}$ -CuPcOC<sub>8</sub>.

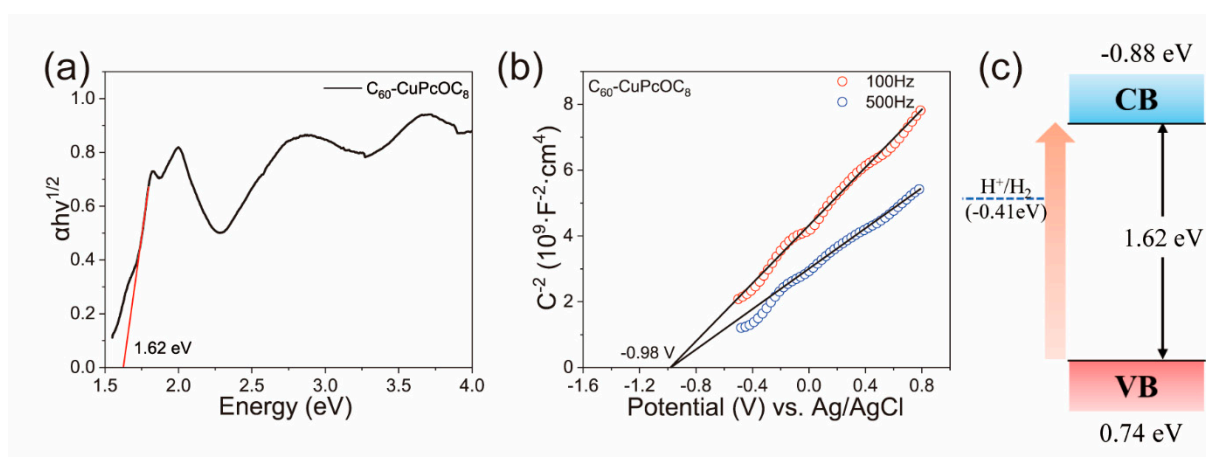

Figure S3. (a) Tauc-plots of  $C_{60}$ -CuPcOC<sub>8</sub>, (b) Mott-Schottky plots of  $C_{60}$ -CuPcOC<sub>8</sub>, (c) schematic representation of the redox potential of  $C_{60}$ -CuPcOC<sub>8</sub>.

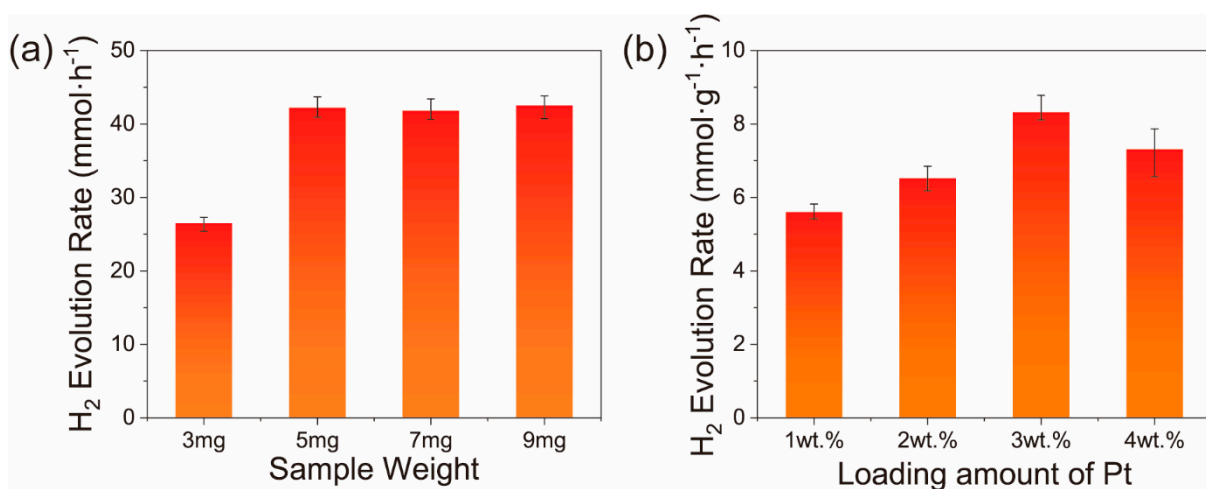

Figure S4. Photocatalytic H<sub>2</sub> evolution rate of  $C_{60}$ -CuPcOC<sub>8</sub> with varied (a) weight and

(b) loading amount of Pt under full-spectrum light.

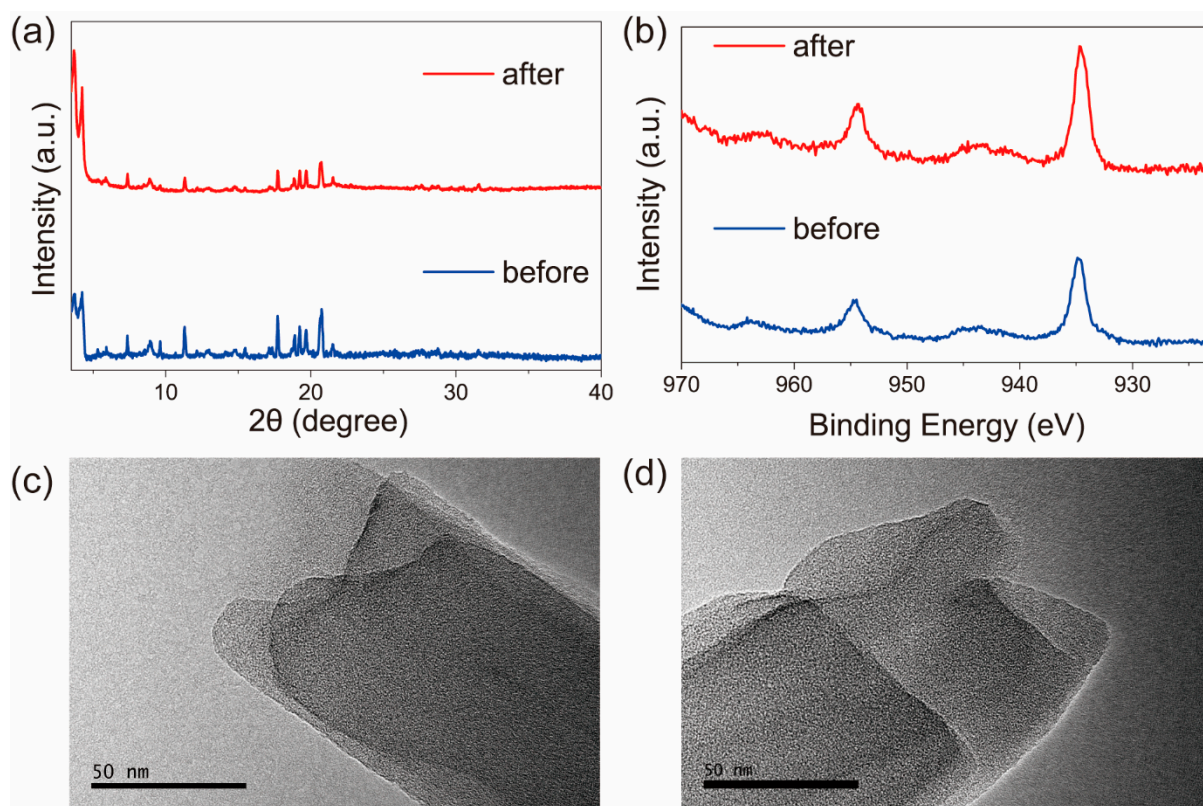

Figure S5 (a) PXRD of  $C_{60}$ -CuPcOC<sub>8</sub> before and after photocatalytic hydrogen generation; (b) Cu elemental XPS of  $C_{60}$ -CuPcOC<sub>8</sub> before and after photocatalytic hydrogen generation; HRTEM of  $C_{60}$ -CuPcOC<sub>8</sub> (c) before and (d) after photocatalytic hydrogen generation.

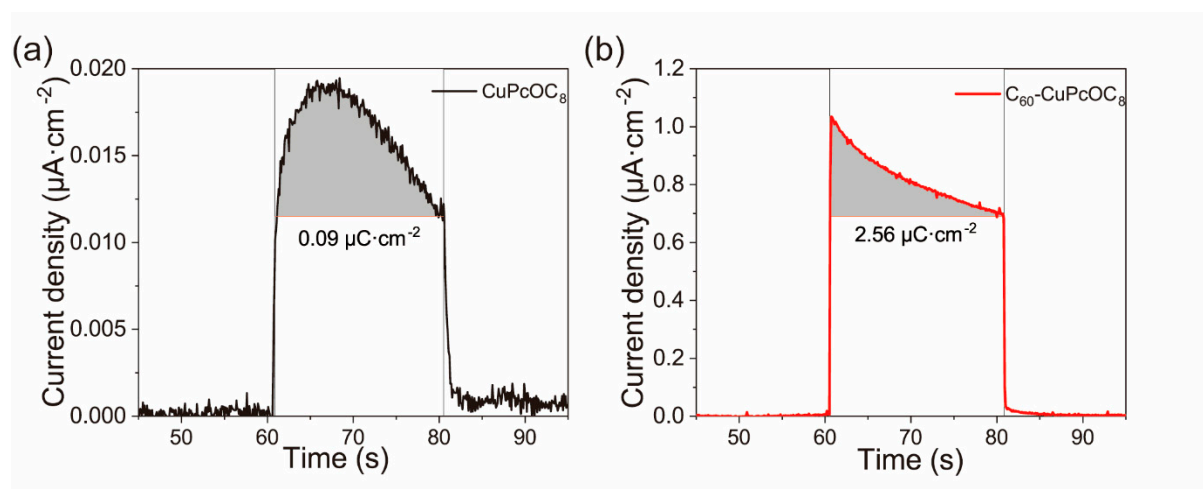

Figure S6. Surface charge density of (a) CuPcOC<sub>8</sub> and (b)  $C_{60}$ -CuPcOC<sub>8</sub>.

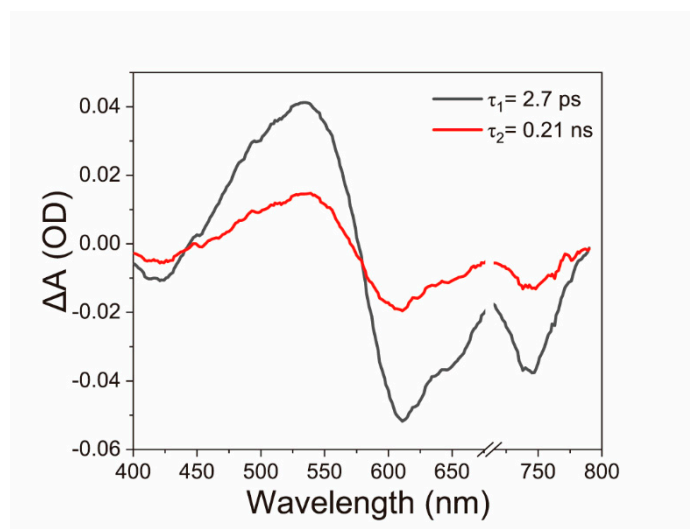

Figure S7. Evolution associated spectra (EAS) of CuPcOC<sub>8</sub> at 380 nm ( $1 \times 10^{-5}$  M, aqueous dispersion).
